# Supplementary material for: Pulmonary Toxicity and Proteomic Analysis in Bronchoalveolar Lavage Fluids and Lungs of Rats Exposed to Copper Oxide Nanoparticles
Source: MDPI journal article supplement (doi:10.3390/ijms232113265), 2022-10-31
Supplement: s1 [file s1]

# **Pulmonary Toxicity and Proteomic Analysis in Bronchoalveolar Lavage Fluids and Lungs of Rats Exposed to Copper Oxide Nanoparticles**

Jung-Taek Kwon<sup>1,†</sup>, Yoonjin Kim<sup>1,†</sup>, Seonyoung Choi<sup>2</sup>, Byung-Il Yoon<sup>3</sup>, Hyun-Sook Kim<sup>4</sup>, Ilseob Shim<sup>1</sup>, Donggeun Sul<sup>2, \*</sup>

1 Environmental Health Research Department, National Institute of Environmental Research, Incheon, Republic of Korea,

2 Graduate School of Medicine, Korea University, Seoul 136-705, Republic of Korea

3 College of Veterinary Medicine and Institute of Veterinary Science, Kangwon National University, Chuncheon 24341, Republic of Korea,

4 Department of Biomedical Laboratory Science, College of Health Science, Cheongju University, Cheongju 28503, Republic of Korea

\*Corresponding author: [dsul@korea.ac.kr](mailto:dsul@korea.ac.kr)

<sup>†</sup>These authors contributed equally to this work

**Journal: IJMS**

**Supplementary Information**

# A

File

Reference Image Selection

Mask Of Disinterest

Alignment

Filtering

Experiment Design Setup

View Results

Progenesis Stats

Spot Picking

Report

Image QC

Reference Image Selection

Mask Of Disinterest

Alignment

Filtering

Experiment Design Setup

View Results

Progenesis Stats

Spot Picking

Report

Image: Rat lung tissue\_pH4-7 spots

실물 위

다시 실행

Image: Rat lung tissue\_pH4-7 spots

Filter spots

You can filter out spots that you do not wish to include in your analysis by using the criteria below:

Average norm. vol.

<=

0

Spot area

<=

1368

Inside selected area

☒

Delete 0 Matching Spots

Delete 783 Non-Matching Spots

Tips

For best results, you should aim to delete any false spots without deleting any of the real spots.

The types of spots to filter out may include:

- Spots in damaged areas
- Spots on the edge of the gel
- Spots outside of the gel e.g. on the scanner bed

Normalisation

Note that all remaining spots will be used in the normalisation calculation. If deleting a substantial number of spots, you should review the normalisation afterwards.

# B

File

Reference Image Selection

Mask Of Disinterest

Alignment

Filtering

Experiment Design Setup

View Results

Progenesis Stats

Spot Picking

Report

Image QC

Reference Image Selection

Mask Of Disinterest

Alignment

Filtering

Experiment Design Setup

View Results

Progenesis Stats

Spot Picking

Report

Image: Rat lung tissue\_pH6-9 spots

실물 위

다시 실행

Image: Rat lung tissue\_pH6-9 spots

Filter spots

You can filter out spots that you do not wish to include in your analysis by using the criteria below:

Average norm. vol.

<=

1545153

Spot area

<=

2219

Inside selected area

☒

Delete 0 Matching Spots

Delete 638 Non-Matching Spots

Tips

For best results, you should aim to delete any false spots without deleting any of the real spots.

The types of spots to filter out may include:

- Spots in damaged areas
- Spots on the edge of the gel
- Spots outside of the gel e.g. on the scanner bed

Normalisation

Note that all remaining spots will be used in the normalisation calculation. If deleting a substantial number of spots, you should review the normalisation afterwards.

**C**

**Control**

pl 4 → 7

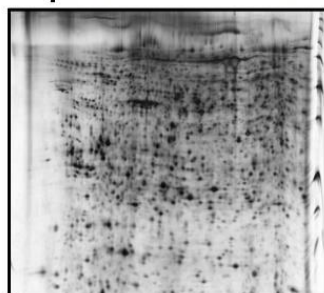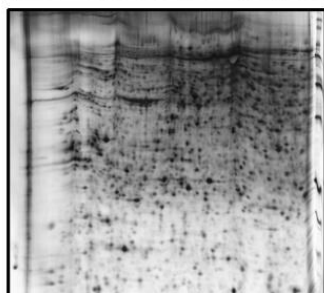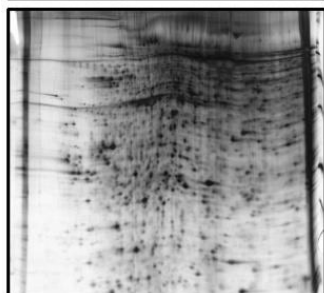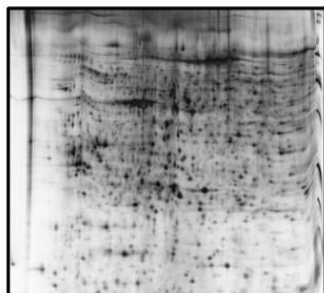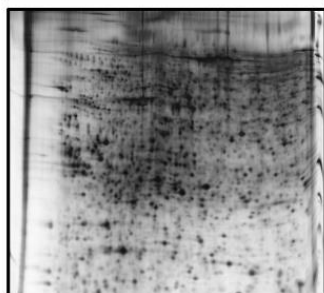

**0.15mg/kg BW**

pl 4 → 7

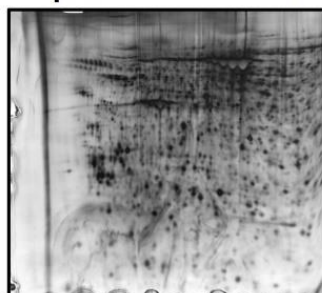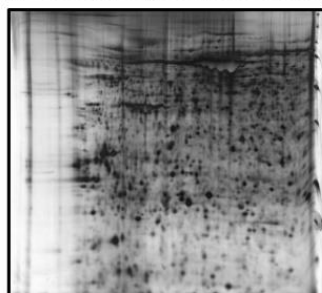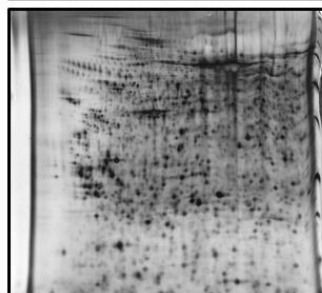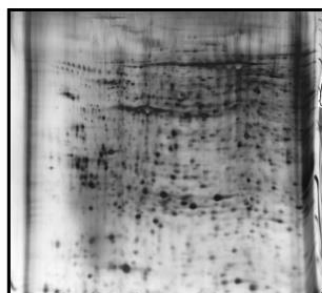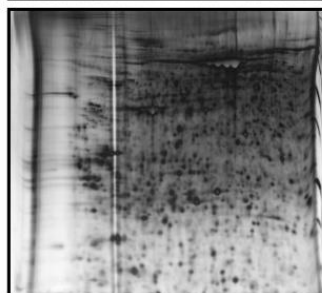

**1.5mg/kg BW**

pl 4 → 7

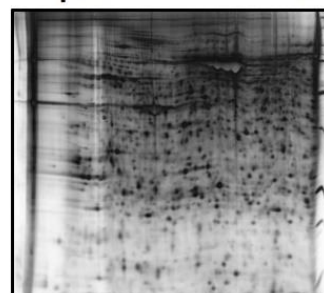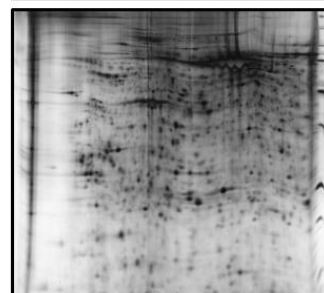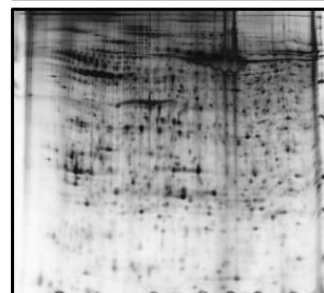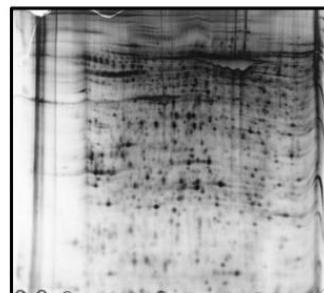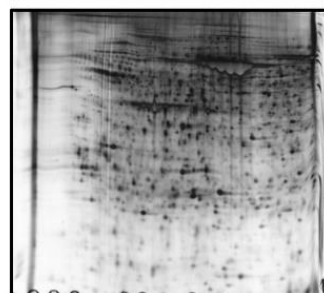



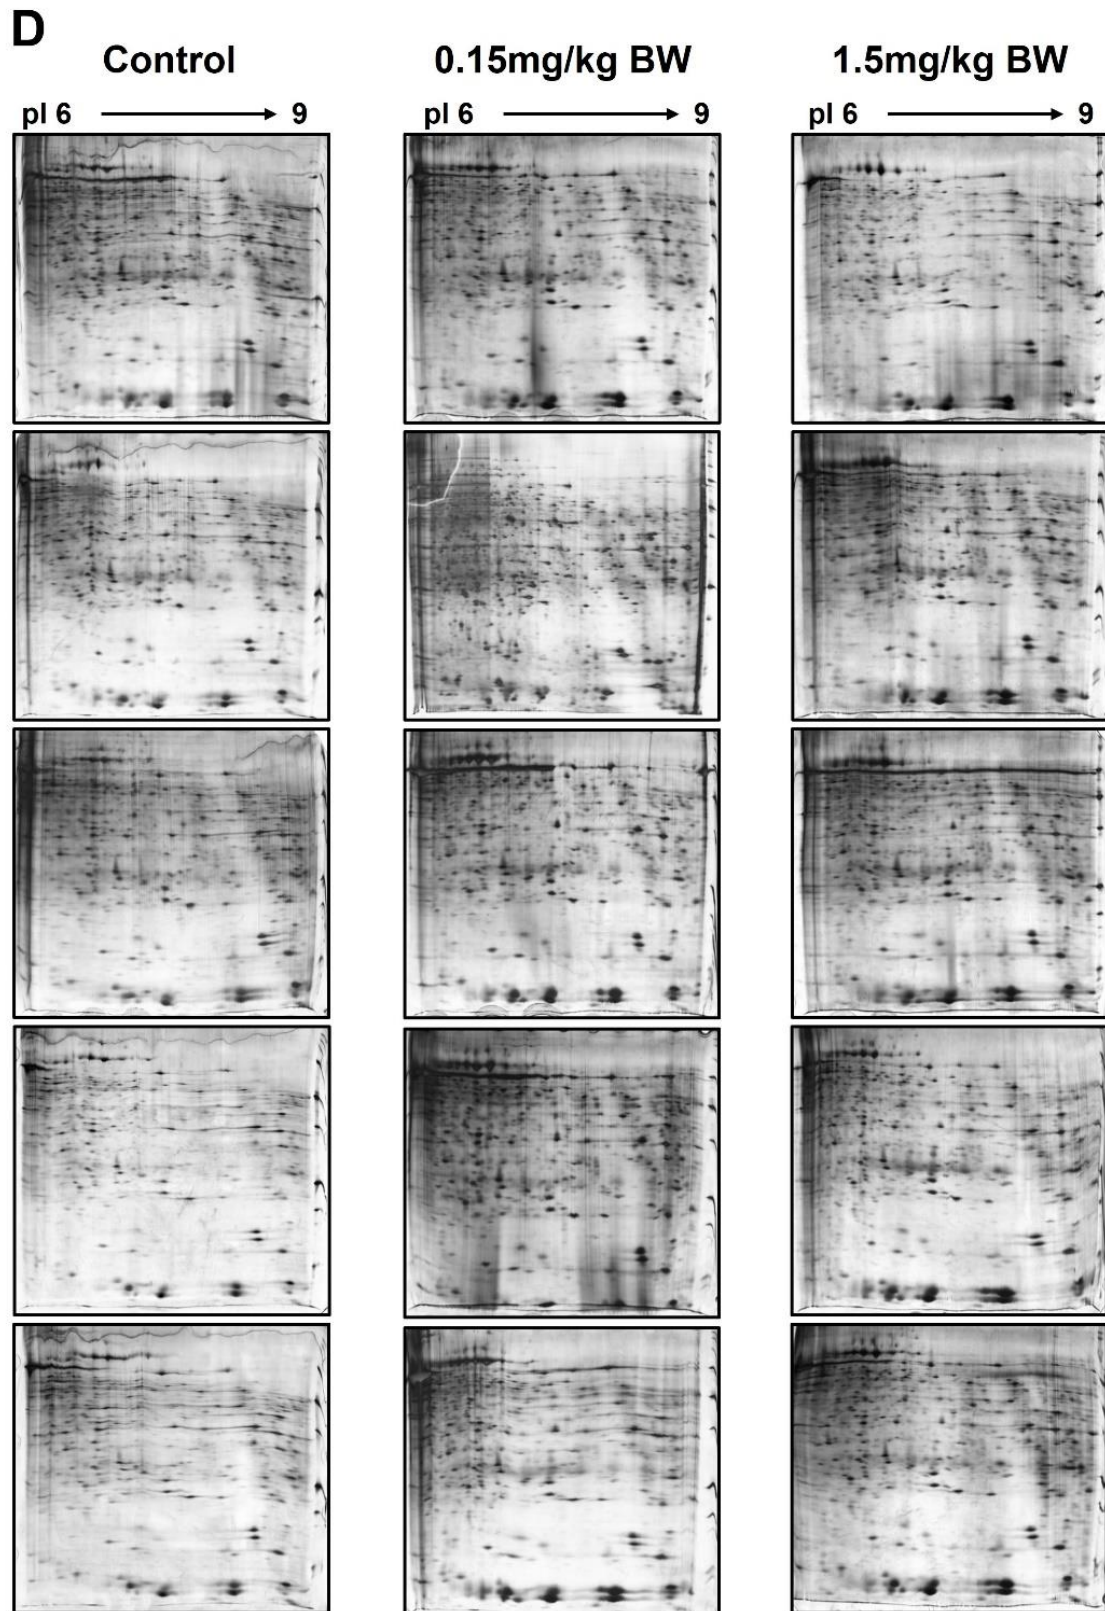

**Figure S1. Supplementary image and original gel data: Gel image data.** After separation on SDS-PAGE gels, the proteins were visualized by silver staining. The silver-stained gels were scanned using a  $3600 \times 4900$  dpi instrument and the image files were transformed into a TIFF format with linear grayscale values. The computer analysis of the 2DE-image was carried out

using Progenesis SameSpot image analysis software. Two different ranges of pI strips (4-7, and 6-9), showed 783 (**A**) and 638 (**B**) protein spots present in the gels, respectively. **Original gel data, (C)** Original gels (pI 4-7) and (**D**) Original gels (pI 6-9).

**Table S1.** Identification of proteins via UPLC-ESI-MS<sup>E</sup>

| Spot No. | Accession No. | Protein name                                   | Sequence coverage (%) | Matched peptides | Theoretical peptides | mW (Da) | pI (pH) | Products | Products RMS Mass Error (ppm) | Products RMS RT Error (min) | Protein ID |
|----------|---------------|------------------------------------------------|-----------------------|------------------|----------------------|---------|---------|----------|-------------------------------|-----------------------------|------------|
| 1        | P17425        | Hydroxymethylglutaryl CoA synthase cytoplasmic | 10.2                  | 3                | 40                   | 57397   | 5.48    | 28       | 33                            | 0.0208                      | 3100       |
| 2        | F7FIH7        | Protein LOC100909412                           | 37                    | 11               | 19                   | 20904   | 5.54    | 60       | 23.29                         | 0.0213                      | 8626       |
| 3        | Q6GX84        | Fidgetin like protein 1                        | 7.8                   | 4                | 60                   | 74150   | 6.61    | 29       | 37.15                         | 0.0231                      | 2479       |
| 4        | M0RBF1        | Complement C3                                  | 30.1                  | 138              | 139                  | 186205  | 6.02    | 1204     | 21.84                         | 0.0229                      | 9870       |
| 5        | D3ZDK8        | Uncharacterized protein                        | 23.5                  | 4                | 12                   | 11016   | 4.55    | 28       | 33.29                         | 0.0184                      | 19936      |
| 6        | P02091        | Hemoglobin subunit beta 1                      | 47.6                  | 10               | 13                   | 15969   | 8.25    | 196      | 23.11                         | 0.0193                      | 3033       |
| 7        | F1LZT6        | Protein Asap2 Fragment                         | 6.6                   | 6                | 75                   | 103093  | 6.36    | 53       | 30.3                          | 0.0247                      | 26089      |
| 8        | F1LWD5        | Protein 1700056E22Rik                          | 9.4                   | 3                | 11                   | 25323   | 10.14   | 35       | 22.6                          | 0.0205                      | 19533      |
| 9        | M3ZCQ3        | Protein LOC100910765                           | 79.3                  | 14               | 8                    | 12132   | 6.61    | 84       | 18.24                         | 0.0211                      | 24625      |
| 10       | Q3B8N7        | TSC22 domain family protein 4                  | 13.2                  | 6                | 30                   | 40016   | 7.41    | 40       | 39.47                         | 0.022                       | 6850       |
| 11       | O35817        | A kinase anchor protein 14                     | 4.8                   | 7                | 48                   | 55721   | 10.19   | 40       | 27.83                         | 0.0351                      | 297        |
| 12       | D3Z8I7        | Protein Gstt3                                  | 19.5                  | 8                | 17                   | 23366   | 9.26    | 51       | 16.59                         | 0.016                       | 15387      |
| 13       | P01946        | Hemoglobin subunit alpha 1 2                   | 48.6                  | 19               | 10                   | 15318   | 8.03    | 300      | 19.78                         | 0.0178                      | 3032       |
| 14       | F1LQ93        | Collagen alpha 1 IX chain                      | 11.2                  | 5                | 57                   | 93768   | 9.84    | 42       | 33.38                         | 0.0269                      | 19366      |
| 15       | P29457        | Serpin H1                                      | 22.5                  | 9                | 33                   | 46488   | 9.19    | 67       | 35                            | 0.0254                      | 6338       |
| 16       | Q07936        | Annexin A2                                     | 45.1                  | 19               | 31                   | 38653   | 7.7     | 198      | 22.96                         | 0.0188                      | 406        |
| 17       | P18420        | Proteasome subunit alpha type 1                | 31.9                  | 12               | 25                   | 29498   | 6.15    | 77       | 29.13                         | 0.0236                      | 5508       |

Proteins were identified based on the search on the UniProt website (<http://www.uniprot.org>) from the Rattus norvegicus (Rat) database (28,063 entries).
